# Supplementary material
Source: MDPI journal article supplement (https://www.mdpi.com/2071-1050/12/15/6123)
Supplement: s1 [file s1]

## Supplementary Materials for 'Forest cover change and the effectiveness of Protected Areas in Himalayas since 1998'

**Table S1.** Statistics of the 108 PAs in Himalaya. Name, type and built year were specified by NAME, IUCN\_CAT and STATUS\_YEAR, respectively

| FID | NAME                      | DESIG                  | DESIG_TY<br>PE | IUCN_C<br>AT | REP_AR<br>EA | GIS_AR<br>EA | STATUS_<br>YR | GOV_TYPE                                           | MANG_AUTH                                  |
|-----|---------------------------|------------------------|----------------|--------------|--------------|--------------|---------------|----------------------------------------------------|--------------------------------------------|
| 0   | Biological<br>Corridor 1  | Biological<br>Corridor | National       | VI           | 149          | 150.3096     | 1999          | Federal<br>national<br>or<br>ministry<br>or agency | Department of Forests and Park<br>Services |
| 1   | Sakteng                   | Wildlife<br>Sanctuary  | National       | IV           | 741          | 744.9259     | 1993          | Federal<br>national<br>or<br>ministry<br>or agency | Department of Forests and Park<br>Services |
| 2   | Jigme Singye<br>Wangchuck | National<br>Park       | National       | II           | 1730         | 1740.43      | 1995          | Federal<br>national<br>or<br>ministry<br>or agency | Department of Forests and Park<br>Services |
| 3   | Royal Manas               | National<br>Park       | National       | II           | 1057         | 1035.678     | 1966          | Federal<br>national<br>or<br>ministry<br>or agency | Department of Forests and Park<br>Services |
| 4   | Khaling                   | Wildlife<br>Sanctuary  | National       | IV           | 334          | 336.805      | 1974          | Federal<br>national<br>or<br>ministry<br>or agency | Department of Forests and Park<br>Services |
| 5   | Phipsoo                   | Wildlife<br>Sanctuary  | National       | IV           | 269          | 270.6314     | 1993          | Federal<br>national<br>or<br>ministry<br>or agency | Department of Forests and Park<br>Services |
| 6   | Bumdeling                 | Wildlife<br>Sanctuary  | National       | IV           | 1521         | 1528.7       | 1995          | Federal<br>national<br>or<br>ministry<br>or agency | Department of Forests and Park<br>Services |

|    |                           |                     |          |    |      |          |      |                                        |                                               |
|----|---------------------------|---------------------|----------|----|------|----------|------|----------------------------------------|-----------------------------------------------|
| 7  | Biological Corridor 8     | Biological Corridor | National | VI | 720  | 939.1009 | 1999 | or agency<br>Federal national ministry | or<br>Department of Forests and Park Services |
| 8  | Wangchuck Centennial Park | National Park       | National | II | 4921 | 4939.602 | 2008 | or agency<br>Federal national ministry | or<br>Department of Forests and Park Services |
| 9  | Biological Corridor 2     | Biological Corridor | National | VI | 275  | 277.0269 | 1999 | or agency<br>Federal national ministry | or<br>Department of Forests and Park Services |
| 10 | Biological Corridor 7     | Biological Corridor | National | VI | 79   | 79.4944  | 1999 | or agency<br>Federal national ministry | or<br>Department of Forests and Park Services |
| 11 | Biological Corridor 4     | Biological Corridor | National | VI | 501  | 503.474  | 1999 | or agency<br>Federal national ministry | or<br>Department of Forests and Park Services |
| 12 | Biological Corridor 6     | Biological Corridor | National | VI | 160  | 160.8812 | 1999 | or agency<br>Federal national ministry | or<br>Department of Forests and Park Services |
| 13 | Biological Corridor 3     | Biological Corridor | National | VI | 376  | 378.0877 | 1999 | or agency<br>Federal national ministry | or<br>Department of Forests and Park Services |
| 14 | Biological Corridor 5     | Biological Corridor | National | VI | 212  | 212.8632 | 1999 | or agency<br>Federal national ministry | or<br>Department of Forests and Park Services |
| 15 | Jigme Dorji               | National            | National | II | 4316 | 4338.361 | 1974 | or agency<br>Federal                   | or<br>Department of Forests and Park          |

|    |                       |                          |          |    |        |          |      |                                           |                                                   |
|----|-----------------------|--------------------------|----------|----|--------|----------|------|-------------------------------------------|---------------------------------------------------|
|    |                       | Park                     |          |    |        |          |      | national ministry<br>or agency            | Services                                          |
| 16 | Thrumshingla          | National<br>Park         | National | II | 905    | 910.4804 | 1998 | Federal<br>national ministry<br>or agency | Department of Forests and Park<br>Services        |
| 17 | Torsa                 | Strict Nature<br>Reserve | National | Ia | 609    | 613.0339 | 1993 | Federal<br>national ministry<br>or agency | Department of Forests and Park<br>Services        |
| 18 | Raksham<br>Chitkul    | Sanctuary                | National | IV | 34.11  | 29.6246  | 1962 | Not Reported                              | Not Reported                                      |
| 19 | Khangchendzo<br>nga   | National<br>Park         | National | II | 1784   | 1798.294 | 1977 | Sub-national<br>ministry<br>agency        | Chief Wildlife Warden, State<br>Forest Department |
| 20 | Corbett               | National<br>Park         | National | II | 520.8  | 574.057  | 1936 | Sub-national<br>ministry<br>agency        | Chief Wildlife Warden, State<br>Forest Department |
| 21 | Limber                | Sanctuary                | National | IV | 26     | 11.24065 | 1987 | Sub-national<br>ministry<br>agency        | Chief Wildlife Warden, State<br>Forest Department |
| 22 | Kedarnath             | Sanctuary                | National | IV | 975.24 | 971.7332 | 1972 | Sub-national<br>ministry<br>agency        | Chief Wildlife Warden, State<br>Forest Department |
| 23 | Govind Pashu<br>Vihar | Sanctuary                | National | IV | 485.89 | 599.0555 | 1955 | Sub-national<br>ministry<br>agency        | Chief Wildlife Warden, State<br>Forest Department |
| 24 | Renukaji              | Sanctuary                | National | IV | 4.02   | 41.66527 | 1964 | Sub-national                              | Chief Wildlife Warden, State                      |

|    |                    |                  |          |    |        |          |      |                                    |    |                                                   |
|----|--------------------|------------------|----------|----|--------|----------|------|------------------------------------|----|---------------------------------------------------|
|    |                    |                  |          |    |        |          |      | ministry<br>agency                 | or | Forest Department                                 |
| 25 | Khokhan            | Sanctuary        | National | IV | 22.45  | 17.44175 | 1954 | Sub-national<br>ministry<br>agency | or | Chief Wildlife Warden, State<br>Forest Department |
| 26 | Itanagar           | Sanctuary        | National | IV | 140.3  | 186.038  | 1978 | Sub-national<br>ministry<br>agency | or | Chief Wildlife Warden, State<br>Forest Department |
| 27 | Pakke (Pakhui)     | Sanctuary        | National | IV | 861.95 | 858.4723 | 1977 | Sub-national<br>ministry<br>agency | or | Chief Wildlife Warden, State<br>Forest Department |
| 28 | Sonai-Rupai        | Sanctuary        | National | IV | 220    | 163.702  | 1998 | Sub-national<br>ministry<br>agency | or | Chief Wildlife Warden, State<br>Forest Department |
| 29 | Simbalbara         | Sanctuary        | National | IV | 19.03  | 163.3549 | 1958 | Not Reported                       |    | Not Reported                                      |
| 30 | Gamgul<br>Siahbehi | Sanctuary        | National | IV | 124    | 90.22727 | 1962 | Sub-national<br>ministry<br>agency | or | Chief Wildlife Warden, State<br>Forest Department |
| 31 | Tundah             | Sanctuary        | National | IV | 64.22  | 106.5646 | 1962 | Sub-national<br>ministry<br>agency | or | Chief Wildlife Warden, State<br>Forest Department |
| 32 | Manali             | Sanctuary        | National | IV | 32     | 98.78882 | 1954 | Sub-national<br>ministry<br>agency | or | Chief Wildlife Warden, State<br>Forest Department |
| 33 | Dachigam           | National<br>Park | National | II | 141    | 333.1638 | 1981 | Sub-national<br>ministry           | or | Chief Wildlife Warden, State<br>Forest Department |

|    |                |                  |          |    |        |          |      |                                    |    |                                                   |
|----|----------------|------------------|----------|----|--------|----------|------|------------------------------------|----|---------------------------------------------------|
| 34 | Kugti          | Sanctuary        | National | IV | 414    | 511.3638 | 1962 | agency<br>Sub-national<br>ministry | or | Chief Wildlife Warden, State<br>Forest Department |
| 35 | Kishtwar       | National<br>Park | National | II | 425    | 1521.896 | 1981 | agency<br>Sub-national<br>ministry | or | Chief Wildlife Warden, State<br>Forest Department |
| 36 | Shri Nainadevi | Sanctuary        | National | IV | 123    | 38.96101 | 1982 | agency<br>Sub-national<br>ministry | or | Chief Wildlife Warden, State<br>Forest Department |
| 37 | Nargu          | Sanctuary        | National | IV | 318    | 286.3923 | 1962 | agency<br>Sub-national<br>ministry | or | Chief Wildlife Warden, State<br>Forest Department |
| 38 | Shikari Devi   | Sanctuary        | National | IV | 72     | 77.21388 | 1962 | agency<br>Sub-national<br>ministry | or | Chief Wildlife Warden, State<br>Forest Department |
| 39 | Bandli         | Sanctuary        | National | IV | 41.32  | 12.88442 | 1962 | agency<br>Sub-national<br>ministry | or | Chief Wildlife Warden, State<br>Forest Department |
| 40 | Gobindsagar    | Sanctuary        | National | IV | 100.34 | 179.0798 | 1962 | agency<br>Sub-national<br>ministry | or | Chief Wildlife Warden, State<br>Forest Department |
| 41 | Majathal       | Sanctuary        | National | IV | 57.55  | 23.92697 | 1954 | agency<br>Sub-national<br>ministry | or | Chief Wildlife Warden, State<br>Forest Department |
| 42 | Daranghati     | Sanctuary        | National | IV | 176.12 | 33.1389  | 1962 | agency<br>Sub-national             |    | Chief Wildlife Warden, State                      |

|    |                           |           |          |    |        |          |      |                                    |    |                                                   |
|----|---------------------------|-----------|----------|----|--------|----------|------|------------------------------------|----|---------------------------------------------------|
|    |                           |           |          |    |        |          |      | ministry<br>agency                 | or | Forest Department                                 |
| 43 | Shilli                    | Sanctuary | National | IV | 2.13   | 2.01395  | 1963 | Sub-national<br>ministry<br>agency | or | Chief Wildlife Warden, State<br>Forest Department |
| 44 | Shimla Water<br>Catchment | Sanctuary | National | IV | 10.25  | 36.40374 | 1958 | Sub-national<br>ministry<br>agency | or | Chief Wildlife Warden, State<br>Forest Department |
| 45 | Talra                     | Sanctuary | National | IV | 46     | 36.05815 | 1962 | Sub-national<br>ministry<br>agency | or | Chief Wildlife Warden, State<br>Forest Department |
| 46 | Darlaghat                 | Sanctuary | National | IV | 6      | 115.6079 | 1962 | Sub-national<br>ministry<br>agency | or | Chief Wildlife Warden, State<br>Forest Department |
| 47 | Kanawar                   | Sanctuary | National | IV | 121.79 | 80.9031  | 1954 | Sub-national<br>ministry<br>agency | or | Chief Wildlife Warden, State<br>Forest Department |
| 48 | Chail                     | Sanctuary | National | IV | 109    | 126.8039 | 1976 | Sub-national<br>ministry<br>agency | or | Chief Wildlife Warden, State<br>Forest Department |
| 49 | Tirthan                   | Sanctuary | National | IV | 61.12  | 61.79479 | 1992 | Sub-national<br>ministry<br>agency | or | Chief Wildlife Warden, State<br>Forest Department |
| 50 | Lachipora                 | Sanctuary | National | IV | 80     | 79.76844 | 1987 | Sub-national<br>ministry<br>agency | or | Chief Wildlife Warden, State<br>Forest Department |

|    |                    |                  |          |    |        |          |      |                                    |    |                                                   |
|----|--------------------|------------------|----------|----|--------|----------|------|------------------------------------|----|---------------------------------------------------|
| 51 | Mahananda          | Sanctuary        | National | IV | 127.22 | 160.9536 | 1976 | Sub-national<br>ministry<br>agency | or | Chief Wildlife Warden, State<br>Forest Department |
| 52 | Great<br>Himalayan | National<br>Park | National | II | 754.5  | 744.7835 | 1962 | Sub-national<br>ministry<br>agency | or | Chief Wildlife Warden, State<br>Forest Department |
| 53 | Neora Valley       | National<br>Park | National | II | 88     | 92.72931 | 1992 | Sub-national<br>ministry<br>agency | or | Chief Wildlife Warden, State<br>Forest Department |
| 54 | Rupi Bhaba         | Sanctuary        | National | IV | 738    | 857.8752 | 1982 | Sub-national<br>ministry<br>agency | or | Chief Wildlife Warden, State<br>Forest Department |
| 55 | Baltal-Thajwas     | Sanctuary        | National | IV | 210.5  | 149.3182 | 1987 | Sub-national<br>ministry<br>agency | or | Chief Wildlife Warden, State<br>Forest Department |
| 56 | Overa-Aru          | Sanctuary        | National | IV | 425    | 456.0403 | 1981 | Sub-national<br>ministry<br>agency | or | Chief Wildlife Warden, State<br>Forest Department |
| 57 | Hirapora           | Sanctuary        | National | IV | 110    | 120.0515 | 1987 | Sub-national<br>ministry<br>agency | or | Chief Wildlife Warden, State<br>Forest Department |
| 58 | Fambong Lho        | Sanctuary        | National | IV | 51.76  | 68.38626 | 1984 | Sub-national<br>ministry<br>agency | or | Chief Wildlife Warden, State<br>Forest Department |
| 59 | Gulmarg            | Sanctuary        | National | IV | 180    | 126.297  | 1987 | Sub-national<br>ministry           | or | Chief Wildlife Warden, State<br>Forest Department |

|    |                      |      |                  |          |    |        |          |      |                                    |    |                                                   |
|----|----------------------|------|------------------|----------|----|--------|----------|------|------------------------------------|----|---------------------------------------------------|
| 60 | Askot<br>Deer        | Musk | Sanctuary        | National | IV | 599.93 | 224.0852 | 1986 | agency<br>Sub-national<br>ministry | or | Chief Wildlife Warden, State<br>Forest Department |
| 61 | Sonanadi             |      | Sanctuary        | National | IV | 301.18 | 196.9338 | 1987 | agency<br>Sub-national<br>ministry | or | Chief Wildlife Warden, State<br>Forest Department |
| 62 | Kais                 |      | Sanctuary        | National | IV | 14.19  | 12.16441 | 1954 | agency<br>Sub-national<br>ministry | or | Chief Wildlife Warden, State<br>Forest Department |
| 63 | Kyongnosla<br>Alpine |      | Sanctuary        | National | IV | 31     | 19.53793 | 1977 | agency<br>Sub-national<br>ministry | or | Chief Wildlife Warden, State<br>Forest Department |
| 64 | Nameri               |      | Sanctuary        | National | IV | 75.6   | 88.73771 | 1985 | Not Reported                       |    | Not Reported                                      |
| 65 | Singalila            |      | National<br>Park | National | II | 78.6   | 78.38895 | 1992 | Sub-national<br>ministry           | or | Chief Wildlife Warden, State<br>Forest Department |
| 66 | Maenam               |      | Sanctuary        | National | IV | 35.34  | 42.93714 | 1987 | agency<br>Sub-national<br>ministry | or | Chief Wildlife Warden, State<br>Forest Department |
| 67 | Churdhar             |      | Sanctuary        | National | IV | 66     | 77.91351 | 1985 | agency<br>Sub-national<br>ministry | or | Chief Wildlife Warden, State<br>Forest Department |
| 68 | Govind               |      | National<br>Park | National | II | 472.08 | 495.3745 | 1990 | agency<br>Sub-national<br>ministry | or | Chief Wildlife Warden, State<br>Forest Department |



|    |                               |                  |          |    |      |          |      |                                           |    |                                                                      |
|----|-------------------------------|------------------|----------|----|------|----------|------|-------------------------------------------|----|----------------------------------------------------------------------|
| 69 | Eagle Nest                    | Sanctuary        | National | IV | 217  | 216.1938 | 1989 | Sub-national<br>ministry<br>agency        | or | Chief Wildlife Warden, State<br>Forest Department                    |
| 70 | Sessa Orchid                  | Sanctuary        | National | IV | 100  | 99.64866 | 1989 | Sub-national<br>ministry<br>agency        | or | Chief Wildlife Warden, State<br>Forest Department                    |
| 71 | Mouling                       | National<br>Park | National | II | 483  | 436.7957 | 1986 | Sub-national<br>ministry<br>agency        | or | Chief Wildlife Warden, State<br>Forest Department                    |
| 72 | Barsey<br>Rhododendron        | Sanctuary        | National | IV | 104  | 138.1825 | 1998 | Sub-national<br>ministry<br>agency        | or | Chief Wildlife Warden, State<br>Forest Department                    |
| 73 | Kane                          | Sanctuary        | National | IV | 31   | 54.84326 | 1991 | Sub-national<br>ministry<br>agency        | or | Chief Wildlife Warden, State<br>Forest Department                    |
| 74 | Makalu-Barun<br>- Buffer Zone | □□□□□□<br>□□     | National | VI | 830  | 782.7542 | 1999 | Federal<br>national ministry<br>or agency | or | Department of National Parks<br>and Wildlife Conservation<br>(DNPWC) |
| 75 | Kanchanjunga                  | □□□□□□<br>□□□□□□ | National | VI | 2035 | 2044.916 | 1998 | Local<br>communities                      |    | Department of National Parks<br>and Wildlife Conservation<br>(DNPWC) |
| 76 | Dhorpatan                     | □□□□□<br>□□□□□   | National | VI | 1325 | 1196.808 | 1987 | Federal<br>national ministry<br>or agency | or | Department of National Parks<br>and Wildlife Conservation<br>(DNPWC) |
| 77 | Chitwan<br>Buffer Zone        | - □□□□□□<br>□□   | National | VI | 750  | 732.6649 | 1996 | Federal<br>national ministry              | or | Department of National Parks<br>and Wildlife Conservation            |

|    |                                     |                            |          |    |        |          |      |                                                           |                                                                                 |
|----|-------------------------------------|----------------------------|----------|----|--------|----------|------|-----------------------------------------------------------|---------------------------------------------------------------------------------|
| 78 | Chitwan                             | □□□□□□<br>□□□□□□<br>□□□    | National | II | 932    | 1217.694 | 1973 | or agency<br>Federal or<br>national ministry<br>or agency | (DNPWC)<br>Department of National Parks<br>and Wildlife Conservation<br>(DNPWC) |
| 79 | Parsa                               | □□□□□□<br>□□□□□□<br>□□□□□□ | National | IV | 499    | 559.3702 | 1984 | Federal or<br>national ministry<br>or agency              | Department of National Parks<br>and Wildlife Conservation<br>(DNPWC)            |
| 80 | Parsa - Buffer<br>Zone              | □□□□□□<br>□□<br>□□□□□□     | National | VI | 298.17 | 299.3581 | 2005 | Federal or<br>national ministry<br>or agency              | Department of National Parks<br>and Wildlife Conservation<br>(DNPWC)            |
| 81 | Khaptad -<br>Buffer Zone            | □□□□□□<br>□□<br>□□□□□□     | National | VI | 216    | 270.5383 | 2006 | Federal or<br>national ministry<br>or agency              | Department of National Parks<br>and Wildlife Conservation<br>(DNPWC)            |
| 82 | Khaptad                             | □□□□□□<br>□□□<br>□□□□□     | National | II | 225    | 208.4355 | 1984 | Federal or<br>national ministry<br>or agency              | Department of National Parks<br>and Wildlife Conservation<br>(DNPWC)            |
| 83 | Shey-<br>Phoksundo -<br>Buffer Zone | □□□□□□<br>□□<br>□□□□□□     | National | VI | 1349   | 1312.829 | 1998 | Federal or<br>national ministry<br>or agency              | Department of National Parks<br>and Wildlife Conservation<br>(DNPWC)            |
| 84 | Shey-<br>Phoksundo                  | □□□□□□<br>□□□<br>□□□□□     | National | II | 3555   | 3611.226 | 1984 | Federal or<br>national ministry<br>or agency              | Department of National Parks<br>and Wildlife Conservation<br>(DNPWC)            |
| 85 | Suklaphanta -<br>Buffer Zone        | □□□□□□<br>□□<br>□□□□□□     | National | VI | 243.5  | 292.8903 | 2004 | Federal or<br>national ministry<br>or agency              | Department of National Parks<br>and Wildlife Conservation<br>(DNPWC)            |
| 86 | Suklaphanta                         | □□□□□□                     | National | IV | 305    | 393.2275 | 1976 | Federal or                                                | Department of National Parks                                                    |

|    |                       |                    |          |    |       |          |      |                                        |                                                                |
|----|-----------------------|--------------------|----------|----|-------|----------|------|----------------------------------------|----------------------------------------------------------------|
|    |                       | □□ □□□□            |          |    |       |          |      |                                        | national ministry and Wildlife Conservation or agency (DNPWC)  |
| 87 | Api - Nampa           | □□□□□□<br>□□□□□□   | National | VI | 1903  | 1905.284 | 2010 | Federal or national ministry or agency | Department of National Parks and Wildlife Conservation (DNPWC) |
| 88 | Annapurna             | □□□□□□<br>□□□□□□   | National | VI | 7629  | 7789.783 | 1992 | Non-profit organisations               | Department of National Parks and Wildlife Conservation (DNPWC) |
| 89 | Shivapuri-Nagarjun    | □□□□□□<br>□□□      | National | II | 159   | 107.755  | 1985 | Federal or national ministry or agency | Department of National Parks and Wildlife Conservation (DNPWC) |
| 90 | Banke - Buffer Zone   | □□□□□□<br>□□       | National | VI | 343   | 328.2709 | 2010 | Federal or national ministry or agency | Department of National Parks and Wildlife Conservation (DNPWC) |
| 91 | Krishnasar            | □□□□□□<br>□□□□□□   | National | VI | 16.95 | 16.7647  | 2009 | Federal or national ministry or agency | Department of National Parks and Wildlife Conservation (DNPWC) |
| 92 | Salkhala              | Wildlife Sanctuary | National | IV | 8.1   | 7.744741 | 1982 | Not Reported                           | Not Reported                                                   |
| 93 | Lantang - Buffer Zone | □□□□□□<br>□□       | National | VI | 420   | 469.433  | 1998 | Federal or national ministry or agency | Department of National Parks and Wildlife Conservation (DNPWC) |
| 94 | Gauri-Shankar         | □□□□□□<br>□□□□□□   | National | VI | 2179  | 2214.733 | 2010 | Non-profit organisations               | Department of National Parks and Wildlife Conservation (DNPWC) |
| 95 | Manaslu               | □□□□□□             | National | VI | 1663  | 1652.417 | 1998 | Non-profit                             | Department of National Parks                                   |

|     |                          |                         |          |    |      |          |      |                                        |                                                                |                                   |
|-----|--------------------------|-------------------------|----------|----|------|----------|------|----------------------------------------|----------------------------------------------------------------|-----------------------------------|
|     |                          |                         | □□□□□□   |    |      |          |      |                                        | organisations                                                  | and Wildlife Conservation (DNPWC) |
| 96  | Sagarmatha - Buffer Zone | □□□□□□<br>□□            | National | VI | 275  | 345.388  | 2002 | Federal or national ministry or agency | Department of National Parks and Wildlife Conservation (DNPWC) |                                   |
| 97  | Sagarmatha               | □□□□□□<br>□□□□          | National | II | 1148 | 1136.219 | 1976 | Federal or national ministry or agency | Department of National Parks and Wildlife Conservation (DNPWC) |                                   |
| 98  | Makalu-Barun             | □□□□□□<br>□□□□          | National | II | 1500 | 1393.035 | 1991 | Federal or national ministry or agency | Department of National Parks and Wildlife Conservation (DNPWC) |                                   |
| 99  | Rara                     | □□□□□□<br>□□□□          | National | II | 106  | 107.1151 | 1976 | Federal or national ministry or agency | Department of National Parks and Wildlife Conservation (DNPWC) |                                   |
| 100 | Rara - Buffer Zone       | □□□□□□<br>□□<br>□□□□□□□ | National | VI | 198  | 198.556  | 2006 | Federal or national ministry or agency | Department of National Parks and Wildlife Conservation (DNPWC) |                                   |
| 101 | Langtang                 | □□□□□□<br>□□□<br>□□□□□  | National | II | 1710 | 1664.761 | 1976 | Federal or national ministry or agency | Department of National Parks and Wildlife Conservation (DNPWC) |                                   |
| 102 | Banke                    | □□□□□□<br>□□□<br>□□□□□  | National | II | 550  | 570.0928 | 2010 | Federal or national ministry or agency | Department of National Parks and Wildlife Conservation (DNPWC) |                                   |
| 103 | Bardia - Buffer Zone     | □□□□□□<br>□□<br>□□□□□□□ | National | VI | 507  | 557.5105 | 1996 | Federal or national ministry or agency | Department of National Parks and Wildlife Conservation (DNPWC) |                                   |

|     |        |                        |          |    |       |          |      |                                        |                                             |                |
|-----|--------|------------------------|----------|----|-------|----------|------|----------------------------------------|---------------------------------------------|----------------|
| 104 | Bardia | □□□□□□<br>□□□<br>□□□□□ | National | II | 968   | 899.7583 | 1976 | Federal or national ministry or agency | Department of Wildlife Conservation (DNPWC) | National Parks |
| 105 | Haleji | Wildlife Sanctuary     | National | IV | 3.24  | 2.82032  | 1977 | Not Reported                           | Not Reported                                |                |
| 106 | Manshi | Wildlife Sanctuary     | National | IV | 23.21 | 22.77441 | 1977 | Not Reported                           | Not Reported                                |                |
| 107 | Ayubia | National Park          | National | V  | 16.84 | 135.4594 | 1984 | Not Reported                           | Not Reported                                |                |

**Table S2.** The data source and resolution of 8 control variables

| <b>Control Variables</b>                 | <b>Source and resolution</b>                                                                                                                              |
|------------------------------------------|-----------------------------------------------------------------------------------------------------------------------------------------------------------|
| elevation                                | <a href="http://srtm.csi.cgiar.org/srtmdata/,90m">http://srtm.csi.cgiar.org/srtmdata/,90m</a>                                                             |
| slope                                    | derived from DEM                                                                                                                                          |
| soil organic carbon                      | <a href="https://www.openlandmap.org/,250m">https://www.openlandmap.org/,250m</a>                                                                         |
| annual precipitation                     | <a href="https://www.worldclim.org/,1km">https://www.worldclim.org/,1km</a>                                                                               |
| annual average temperature               | <a href="https://www.worldclim.org/,1km">https://www.worldclim.org/,1km</a>                                                                               |
| distance to the nearest major road       | <a href="https://www.globio.info/download-grip-dataset">https://www.globio.info/download-grip-dataset</a>                                                 |
| distance to the nearest major settlement | <a href="https://sedac.ciesin.columbia.edu/data/set/grump-v1-settlement-points">https://sedac.ciesin.columbia.edu/data/set/grump-v1-settlement-points</a> |
| distance to the nearest river            | <a href="https://www.hydrosheds.org/page/hydrorivers">https://www.hydrosheds.org/page/hydrorivers</a>                                                     |

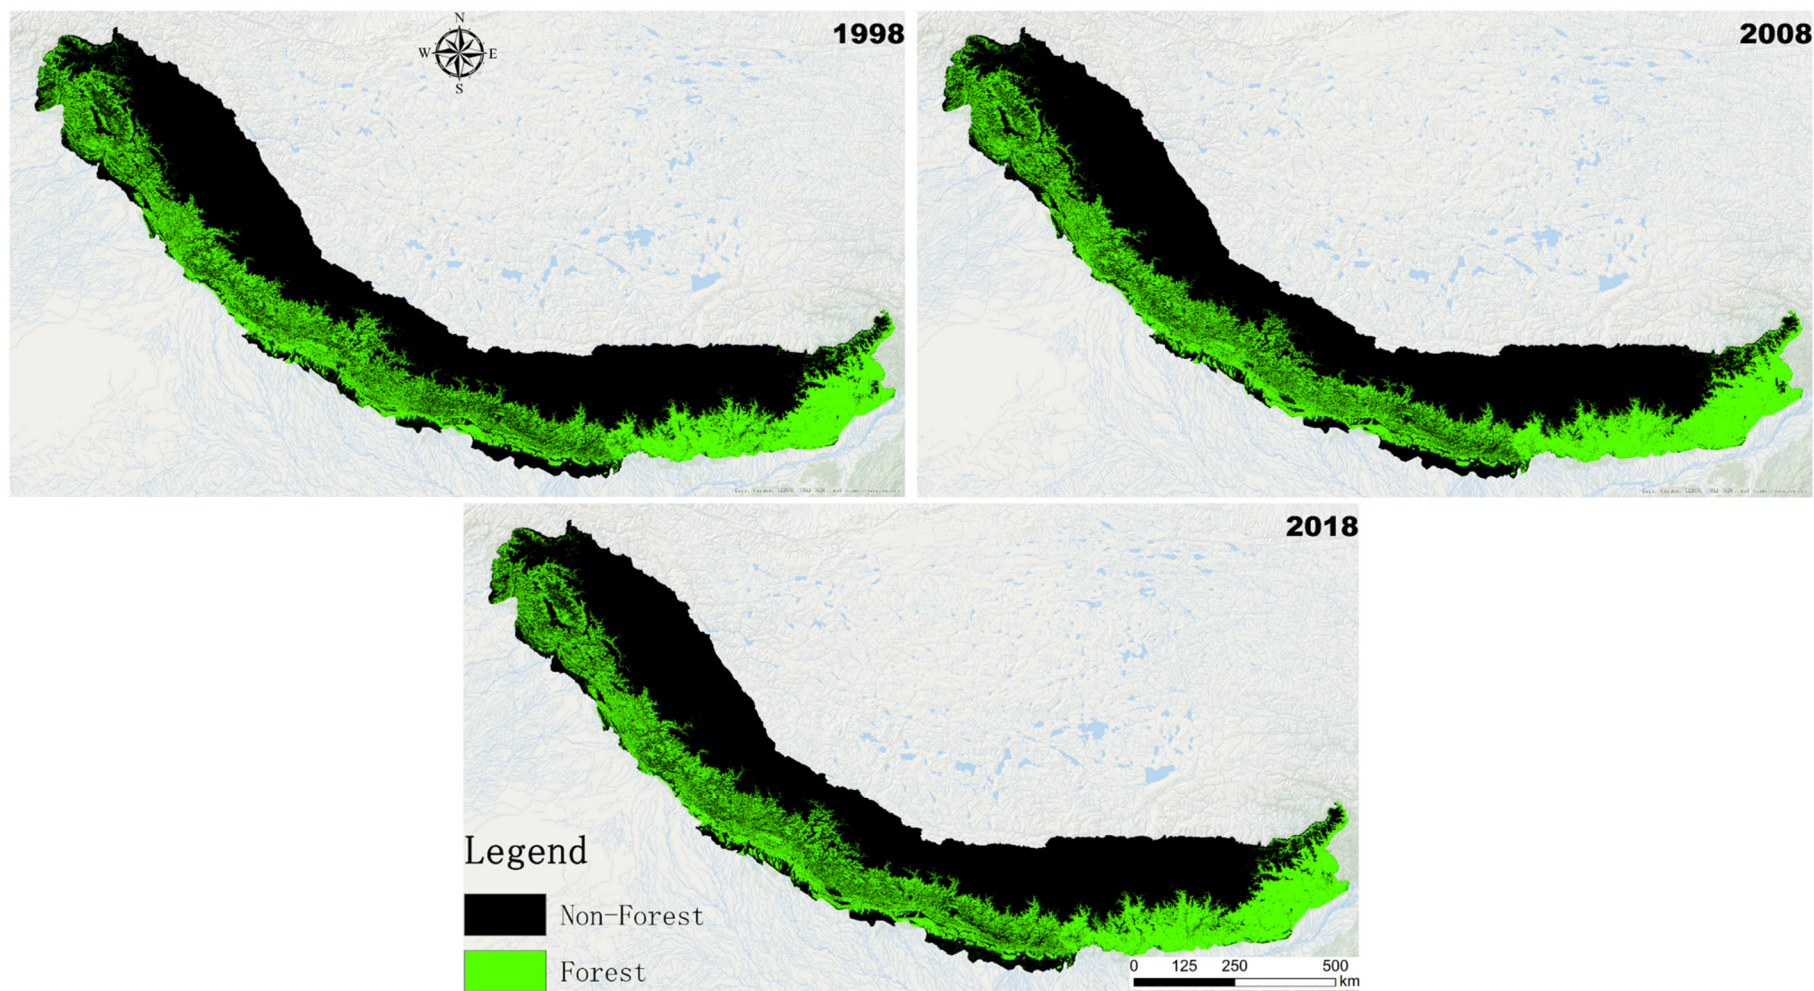

Figure S1. Forest cover map of Himalaya in 1998, 2008 and 2018.



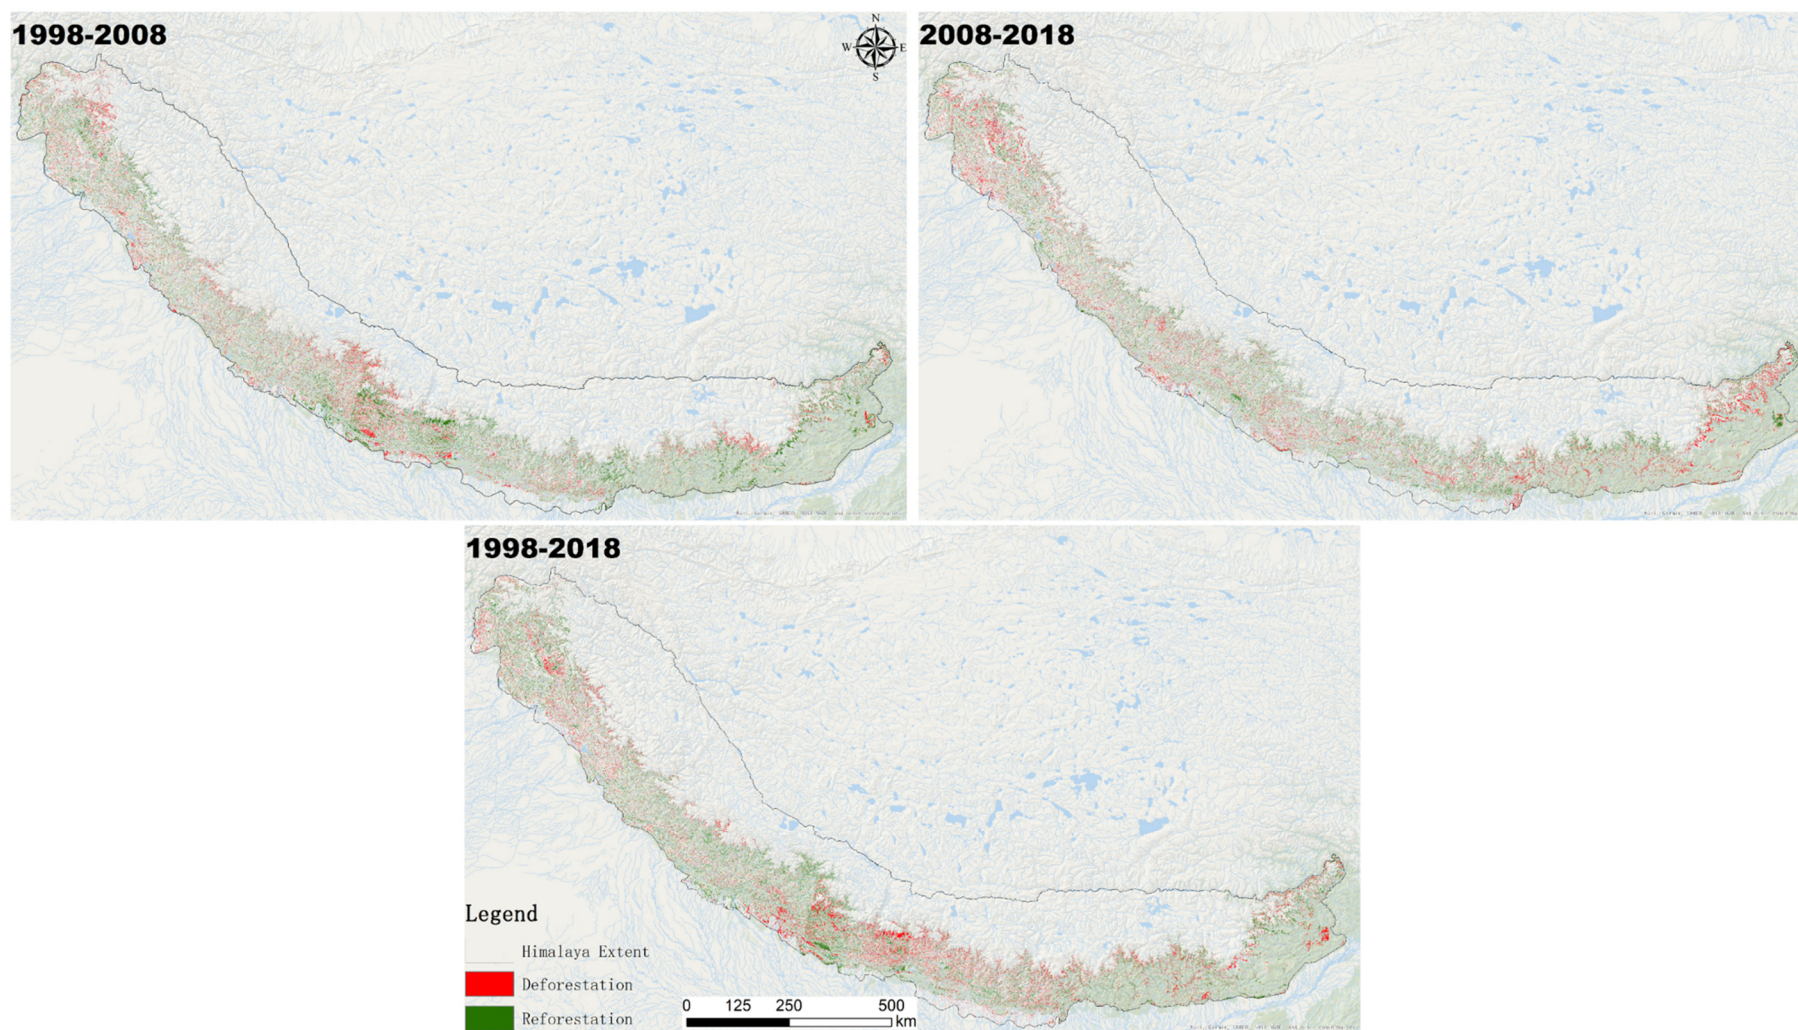

Figure S2. Deforestation and reforestation in three periods of Himalaya



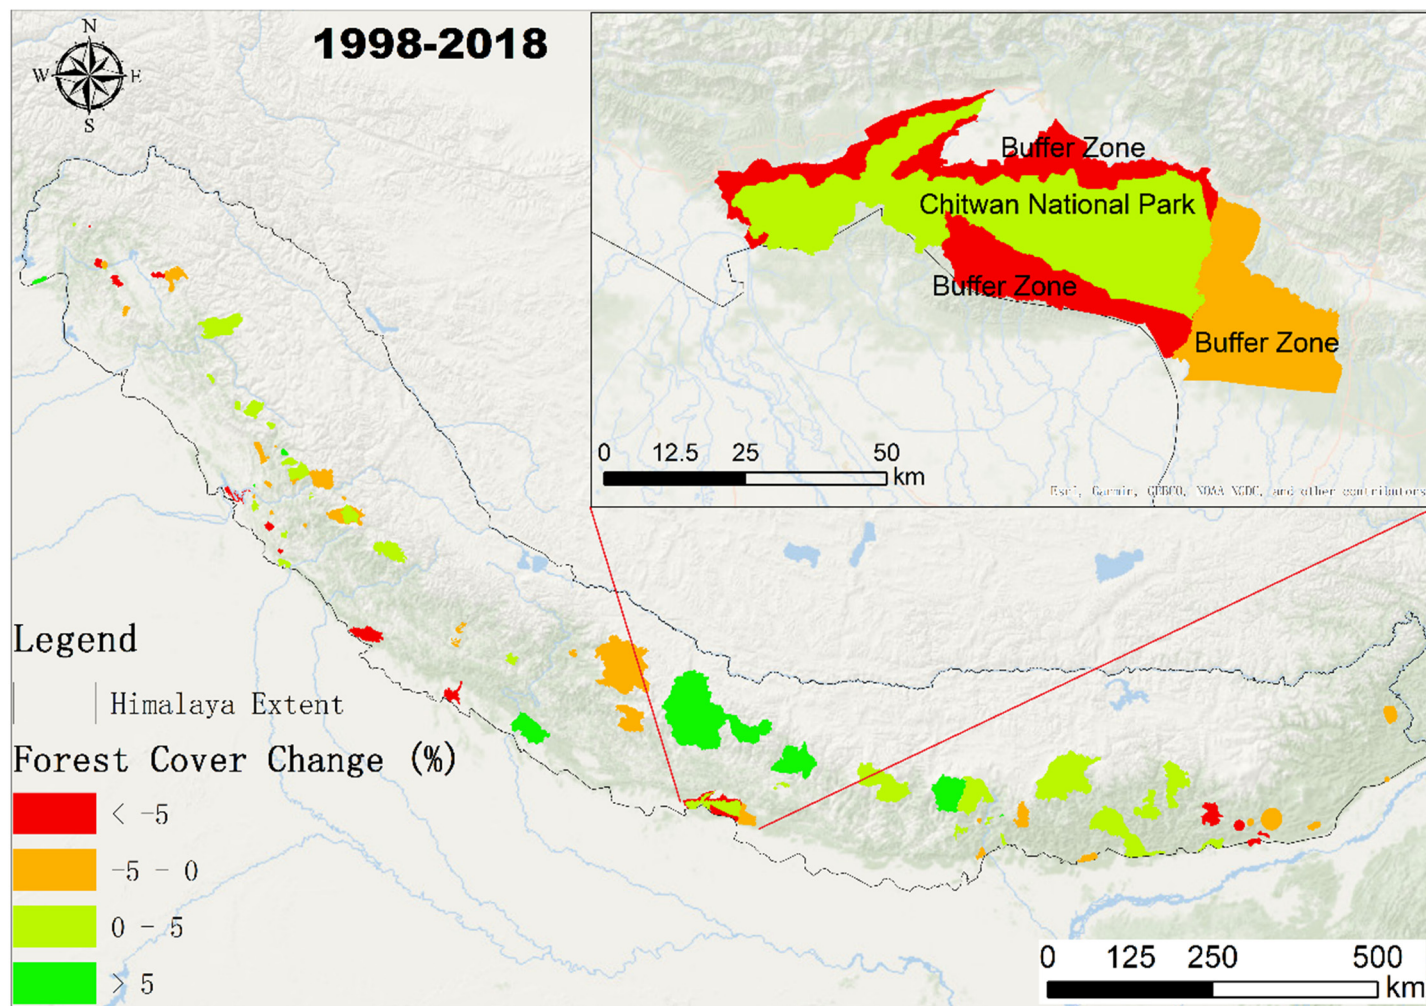

Figure S3. Amplification map of forest cover change in Chitwan National Park
